# Supplementary material for: Strategy of fabrication of controlled thermosetting gel based on soybean oil towards supercritical carbon dioxide foaming
Source: Royal Society of Chemistry journal article supplement (doi:10.1039/c3gc41506f), 2013-10-15
Supplement: c3gc41506f.pdf [file c3gc41506f.pdf]

Electronic Supplementary Information

**Strategy of fabrication of controlled thermosetting gel based on soybean oil  
towards supercritical carbon dioxide foaming**

Pu Xie,<sup>a,b</sup> Hong Liu,<sup>c</sup> Shou Ji Qiu,<sup>a,b</sup> Min Zhi Rong,<sup>\*a,b</sup> Ming Qiu Zhang,<sup>\*a,b</sup> Zhong  
Yuan Lv<sup>c</sup> and Su Ping Wu<sup>a,b</sup>

<sup>a</sup> Key Laboratory for Polymeric Composite and Functional Materials of Ministry of  
Education, DSAPM Lab, School of Chemistry and Chemical Engineering, Sun  
Yat-sen University, Guangzhou 510275, P. R. China

<sup>b</sup> Materials Science Institute, Sun Yat-sen University, Guangzhou 510275, P. R. China

<sup>c</sup> State Key Laboratory of Theoretical and Computational Chemistry, Institute of  
Theoretical Chemistry, Jilin University, Changchun 130023, P. R. China

**Table S1.** Creation of an orthographic factorial design of eight factors and ten levels  
for preparation of AESO/St gel

| Level | Factor      |         |        |         |               |              |                            | $\Delta T^*$<br>(°C) |
|-------|-------------|---------|--------|---------|---------------|--------------|----------------------------|----------------------|
|       | AESO<br>(g) | St (ml) | T (°C) | CP (ml) | CoOct<br>(ml) | DTBP<br>(ml) | Gel time<br>(min)          |                      |
| 1     | 22.5        | 2.75    | 51     | 0.15    | 0.10          | 0.8          | No reaction<br>within 48 h | 0                    |
| 2     | 21.25       | 4.12    | 60     | 0.35    | 0             | 0.6          | No reaction<br>within 38 h | 0                    |
| 3     | 20          | 5.49    | 69     | 0       | 0.12          | 0.4          | No reaction<br>within 36 h | 0                    |
| 4     | 18.75       | 6.87    | 45     | 0.2     | 0.02          | 0.2          | 900                        | 0                    |
| 5     | 17.5        | 8.24    | 54     | 0.4     | 0.14          | 0            | 55                         | 38                   |
| 6     | 16.25       | 9.62    | 63     | 0.05    | 0.04          | 0.9          | No reaction<br>within 24 h | 0                    |
| 7     | 15          | 10.99   | 72     | 0.25    | 0.16          | 0.7          | 32                         | 0                    |
| 8     | 13.75       | 12.36   | 48     | 0.45    | 0.06          | 0.5          | 70                         | 13                   |
| 9     | 12.5        | 13.74   | 57     | 0.10    | 0.18          | 0.3          | No reaction<br>within 24 h | 0                    |
| 10    | 11.25       | 15.22   | 66     | 0.30    | 0.08          | 0.1          | 22                         | 65                   |

\*  $\Delta T$  represents the temperature rise during the polymerization. Multiple regression and multi-objective optimization were carried out on the basis of Table S1 (target parameters:  $\Delta T = 0$ , gel time = 2 h). It was found that stable gel can be obtained under 54 °C when AESO = 20 g, St = 8.3 ml, CP = 0.35 ml, DTBP = 0.3 ml, CoOct = 0.15 ml (i.e. AESO/St (w/w=7:3); CP/DTBP/CoOct (v/v/w=3.5/3/0.002)).

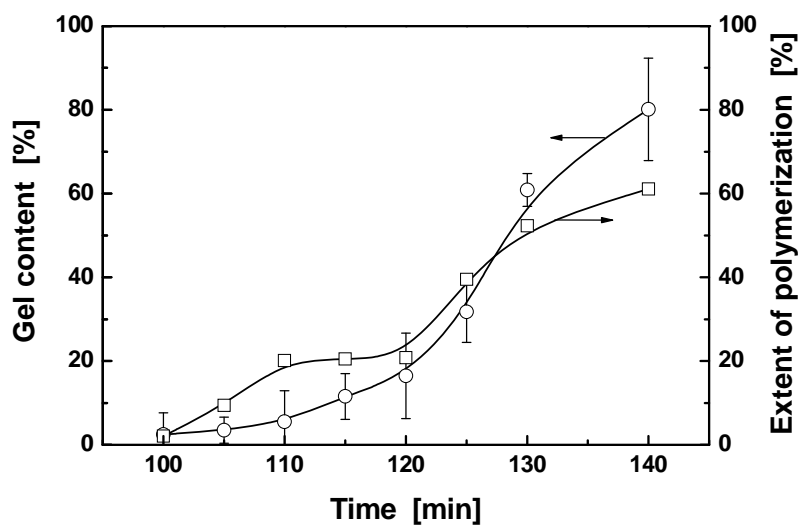

**Figure S1.** Gel content and extent of polymerization of AESO/St with CP/DTBP/CoOct initiator as a function of reaction time. Compositions: AESO/St (w/w=7:3), CP/DTBP/CoOct (v/v/w=3.5/3/0.002). Reaction temperature: 54 °C.

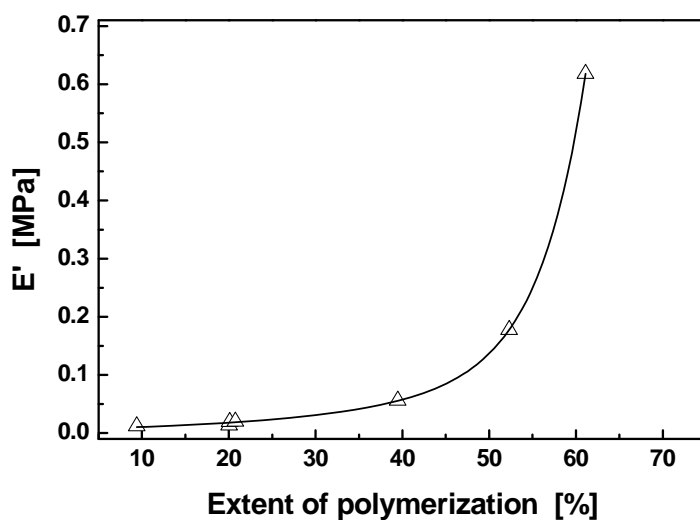

**Figure S2.** Dependence of storage modulus on extent of polymerization of AESO/St gel.
